# Supplementary material for: Diverse Causes of Extreme Rainfall in November 2023 over Equatorial Africa
Source: Copernicus journal article supplement (doi:10.5194/egusphere-2025-76), 2025-02-17
Supplement: Supplementary file [file egusphere-2025-76-AC1-supplement.pdf]

Dear Reviewer #1 Thank you for your careful review of our manuscript. Your comments are greatly appreciated and we think this new version of the manuscript responds to your concerns and provides an interesting contribution to the study of November 2023 extreme rainfall. The pdf file containing the response is attached.

### **Anonymous Referee #1**

#### SOME GENERAL COMMENTS

*Rainfall over Africa should not be evaluated using a reanalysis product. There are plenty of good observational and satellite products. It is well known that reanalysis products do not adequately represent rainfall in this region, unless the rainfall presented in the reanalysis is merely from an observational or satellite source. A recent article by Lavers et al. shows that ERA5 cannot get maximum precipitation right. Since the authors do use reanalysis rainfall, they need to find out more about the rainfall product in ERA5 and discuss this in the manuscript. They should also find an article (I think one exists) discussing how well ERA5 performs over Africa.*

**Response: We agree with the reviewer on this point. We recognise that ERA5 underestimates rainfall in Africa, however this reanalysis does a good job of representing the seasonal variability of September-October-November rainfall (Kenfack et al. 2024a), mainly over the whole region. Also, Gleixner et al. (2020) showed that although it underestimates rainfall amounts, the ERA5 reanalysis represents rainfall well during extreme years, over east Africa region.**

**Furthermore, given that this study focuses on the causes of the November 2023 rainfall, it was imperative for us to focus on dynamic analyses, which is why the ERA5 reanalysis outputs were used, following the study by Cook and Vizy (2021) which demonstrated that ERA5 reanalysis is able to represent precipitation regime and associated dynamics compared with other reanalyses, especially over the Congo Basin. We drew up this rainfall anomaly map with ERA5 to check that the reanalysis simulates extreme rainfall, in order to study how the dynamic fields are associated with this rainfall pattern.**

**However, we repeated these analyses with the TAMSAT, GPCP, GPCC and IMERG datasets, and the results are similar. Thus, we have concluded to present only the CHIRPS results. below the results with other datasets.**

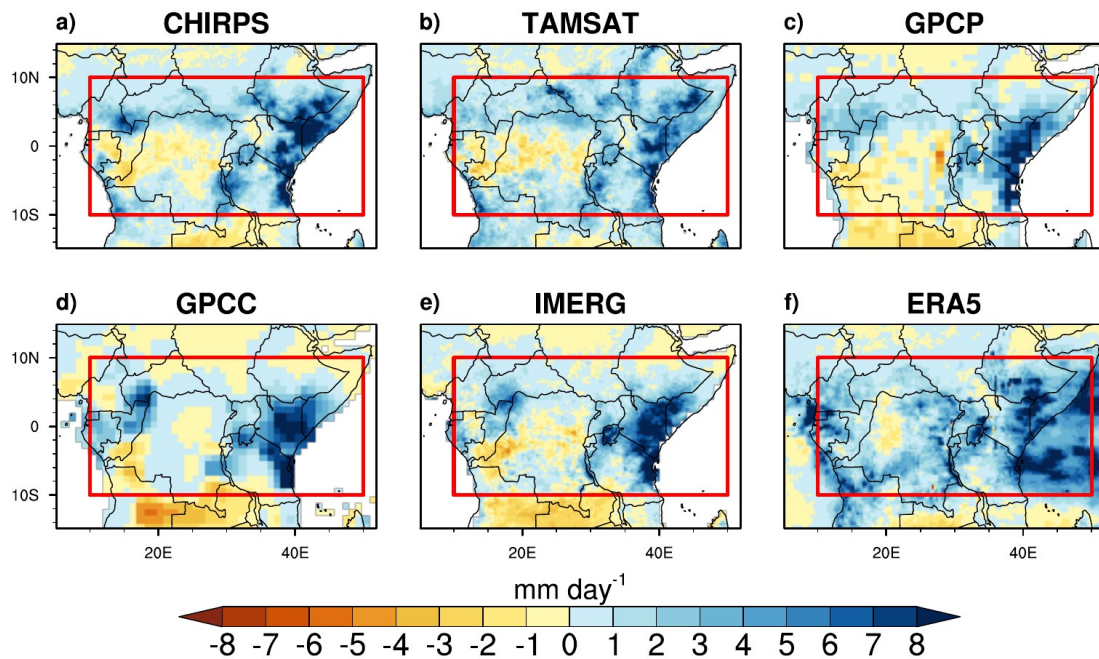

Kenfack, K., Tamoffo, A. T., Tchotchou, L. A. D., Marra, F., Kaissassou, S., Nana, H. N., & Vondou, D. A. (2024). Processes behind the decrease in Congo Basin precipitation during the rainy seasons inferred from ERA-5 reanalysis. *International Journal of Climatology*, *44*(5), 1778-1799. <https://doi.org/10.1002/joc.8410>

Gleixner, S., Demissie, T., & Diro, G. T. (2020). Did ERA5 improve temperature and precipitation reanalysis over east africa? *Atmosphere*, *11*(9), 996. <https://doi.org/10.3390/atmos11090996>

Cook, K. H., & Vizy, E. K. (2021). Hydrodynamics of regional and seasonal variations in Congo Basin precipitation. *Climate Dynamics*, *59*(5-6), 1775-1797. <https://doi.org/10.1007/s00382-021-06066-3>

There is no monsoon over East Africa. There are some studies that suggest there is, but only monsoonal wind shift is in the two dry seasons. The only monsoonal area is West Africa. This should be removed from line 82 and also the caption of Fig. 11a, and wherever else it appears.

**Response: We agree with the reviewer that the presence of Monsoon in East Africa is the subject of many debates. We have rewritten these sentences.**

The article omits what this reviewer considers to be pivotal articles on variability of the short rains, Hastenrath et al. 2010 and 2011. These clearly explain the importance of the low-level wind anomalies seen in Fig. 6.

**Response: This comment is taken into account. Please see the revised manuscript. Line 412**

*The recent paper by Herrnegger et al. (2024) discussing the flooding in 2023 should also be added when discussing the rainfall anomalies.*

**Response: This comment is taken into account. Please see the revised manuscript.**

**Line 90**

## **A LOT OF SMALL ISSUES**

*Line 115 - Nicholson (2015) demonstrated that the IOD, ENSO, and zonal winds all play a role; did not state that increased rainfall is due to the presence of the IOD. This whole discussion is confusing. All three of those factors play a role. They major occur jointly, but each alone can also produce increased rainfall.*

**Response: We agree with the reviewer on this point. In fact, the sentence is not complete. It has been rewritten. Please see the revised manuscript in **Lines 116-119****

**“Studies by Nicholson (2015) showed that IOD plays a role in the East African rainfall modulation, while Palmer et al. (2023) showed that increased rainfall in this region is due to the presence of positive IOD events in the October-December (OND) season.”**

*Line 170 the word "more" should be replaced by "additional"*

**Response: This comment is taken into account. Please see the revised manuscript in **Lines 173****

*Line 189 Perhaps I missed it, but I don't think CB cell has been defined.*

**Response: This comment is taken into account. Please see the revised manuscript and the text adjusted. **Lines 192-205****

**“Research indicates the existence of a shallow, zonal overturning circulation over western EA, identified and termed the Congo Basin cell (CB cell) by Longandjo and Rouault (2020). This cell is a closed, and shallow zonal circulation confined to the lower troposphere (1000-800 hPa), and remains active throughout the year. Similar to Low-level westerlies (LLWs), the CB cell's intensity and width are influenced by near-surface temperature warming over both the western EA landmass and the eastern equatorial Atlantic (Longandjo and Rouault 2020; Taguela et al. 2022). The cell reaches its peak intensity and width in September. According to Longandjo and Rouault (2020), the CB cell's eastern boundary aligns with the Congo Air Boundary, a convergence zone. Here, LLW originating from the equatorial Atlantic, after traversing western EA, converges with the easterly winds of the Indian monsoon system, creating the cell's ascending branch. This convergence zone is characterized by peak convection and precipitation.**

Consequently, the longitudinal position of maximum rainfall in the region is determined by the width of the CB cell.”

Fig. 1a and d -this calculation must be off. November cannot possibly supply more than 30% of annual rainfall over Kenya and southern Somalia.

**Response:** This calculation was repeated using other datasets (gauge, satellite and operational) and the results are the same. Furthermore, the method used to carry out this calculation is the same as that used by Gudoshava et al. (2022), where the authors showed that over central Kenya (south of Somalia), rainfall during the OND season has a contribution of more than 60% (50%), and Palmer et al. (2023) showed that peak rainfall during this season occurs during the months of October-November.

Gudoshava, M., Wanzala, M., Thompson, E., Mwesigwa, J., Endris, H. S., Segele, Z., Hirons, L., Kipkogei, O., Mumbua, C., Njoka, W., Baraibar, M., de Andrade, F., Woolnough, S., Atheru, Z., & Artan, G. (2022). Application of real time S2S forecasts over Eastern Africa in the co-production of climate services. *Climate Services*, 27, 100319. <https://doi.org/10.1016/j.cliser.2022.100319>

Palmer, P. I., Wainwright, C. M., Dong, B., Maidment, R. I., Wheeler, K. G., Gedney, N., Hickman, J. E., Madani, N., Folwell, S. S., Abdo, G., Allan, R. P., Black, E. C. L., Feng, L., Gudoshava, M., Haines, K., Huntingford, C., Kilavi, M., Lunt, M. F., Shaaban, A., & Turner, A. G. (2023). Drivers and impacts of Eastern African rainfall variability. *Nature Reviews Earth & Environment*, 4(4), 254–270. <https://doi.org/10.1038/s43017-023-00397-x>

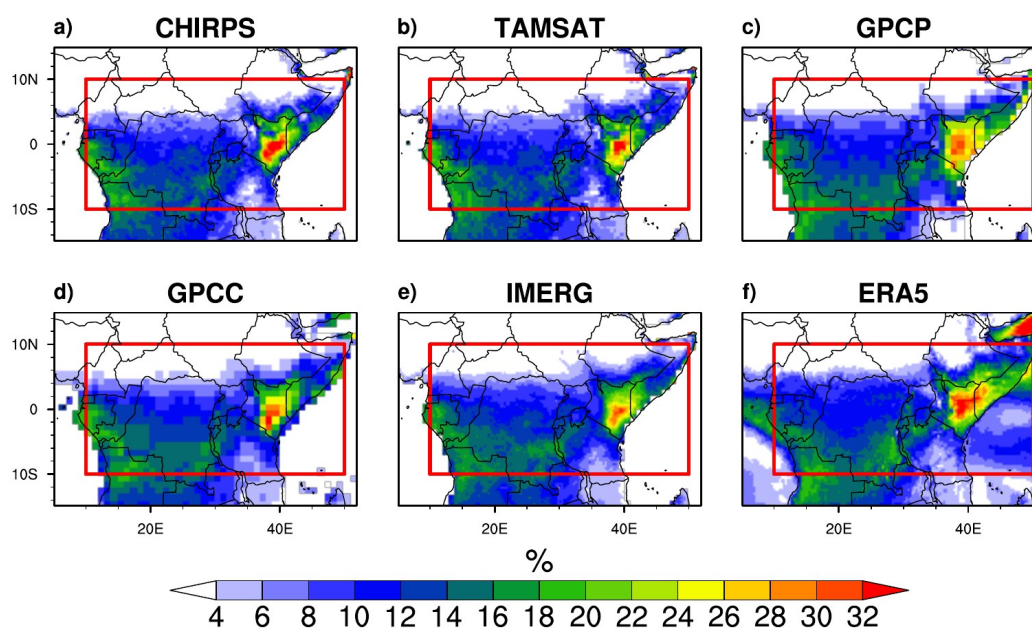

2.1 There is a units problem. SSTs should not be in K. It should be kg, not Kg. Surface pressure should be hPa, not Pa.

**Response:** Here, we have just set the SSTs and Surface pressure units as they are indicated when they are downloaded from the copernicus library (<https://cds.climate.copernicus.eu/datasets/reanalysis-era5-single-levels-monthly-means?tab=overview>). We have rewritten the 'Kg' unit as 'kg'. Please see **line 152** in the revised manuscript.

*Line 242 This is very misleading. Rainfall was just below normal in 1992. Even 1983 I would not call a drought year.*

**Response:** Several authors (e.g., Shisanya 1990) have shown that during these two El Niño years (1983 and 1992), several regions of East Africa (east of 35° E) experienced severe droughts, such as Kenya, which was one of the countries most affected by the 1983 drought (Shisanya 1990), and Tanzania in 1992 (Ibebuchi 2021). Fig. 4a shows the standardised November rainfall anomalies not just over eastern Africa (35°-50° E), but over the whole of Equatorial Africa (10°-50° E), which explains why the negative anomalies are small. The references to these statements have been added to the revised manuscript for the reader's information. **Lines 223, 260**

Ibebuchi, C.C., 2021. Revisiting the 1992 severe drought episode in South Africa: the role of El Niño in the anomalies of atmospheric circulation types in Africa south of the equator. *Theor. Appl. Climatol.* 146, 723-740.

Shisanya, Chris A., 1990. The 1983-1984 drought in Kenya. *J. East. Afr. Res. Dev.* 20, 127-148. <http://www.jstor.org/stable/24326214>

*Fig. 2. The authors need to look further at how ERA5 obtains SST data. Surely ERSST is incorporated into it, which would explain the similarities in a and b. It might just use ERSST. Again, as with rainfall, the authors should have used a bona fide SST data set.*

**Response:** Compared to other reanalysis datasets, ERA5 better captures the SST over the tropical Oceans (Yao et al. 2021). The study by Huang et al. (2018) showed that ERSSTv5 and HadISST perform well for SSTs over the Pacific, Atlantic and Southern Oceans, with better performance in the ERSSTv5 dataset. However, we repeated these analyses with the HadISST and OISSTv2 datasets, and the results are similar. Thus, following Huang et al. (2018), we have concluded to present only the ERSST results. below the results with other datasets.

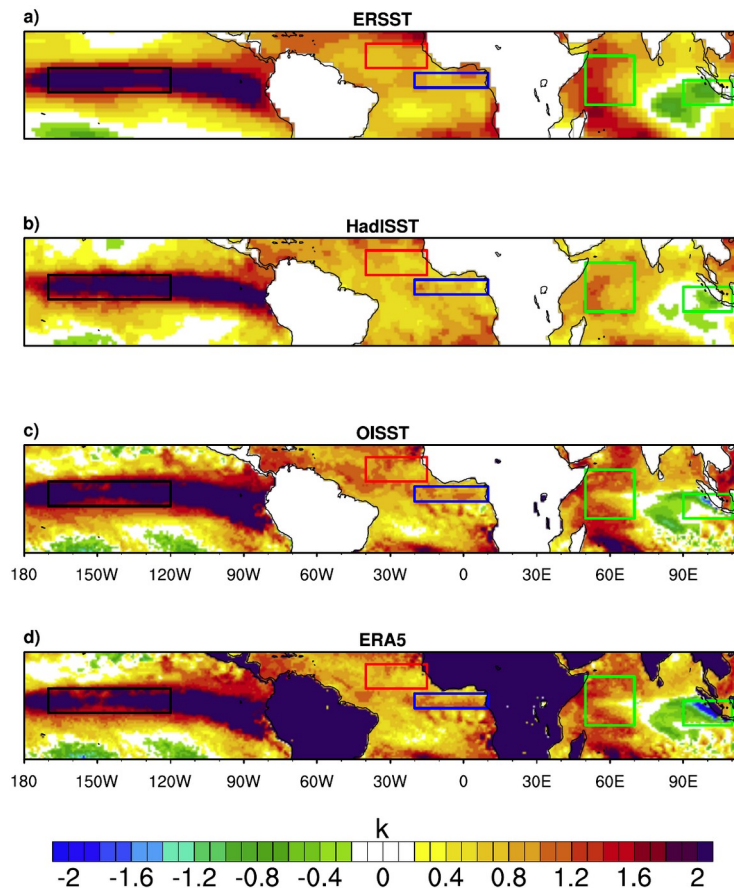

Huang, B., Angel, W., Boyer, T., Cheng, L., Chepurin, G., Freeman, E., Liu, C., & Zhang, H.-M. (2018). Evaluating SST analyses with independent ocean profile observations. *Journal of Climate*, 31(13), 5015–5030. <https://doi.org/10.1175/jcli-d-17-0824.1>

Yao, L., Lu, J., Xia, X., Jing, W., & Liu, Y. (2021). Evaluation of the ERA5 sea surface temperature around the Pacific and the Atlantic. *IEEE Access*, 9, 12067–12073. <https://doi.org/10.1109/access.2021.3051642>

*Fig. 3 needs more in the caption. For example, what are the boxes? Indicate that the correlation is with November rainfall. This is clarified later on, but this should be put in the caption at this point.*

**Response:** Thanks to the reviewer for this comment. The title of the figure has been changed. Please see **Fig. 3 caption** in the revised manuscript.

**“Fig 3: Correlation coefficient between (a) Eastern EA (yellow box; 30° E-50° E), (b) Congo Basin (yellow box; 15° E-30° E), and (c) Western EA (yellow box; 10° E-15° E) rainfall with SST during 1981-2023 period. The oceanic boxes are the same as those in Fig. 2. The stippling occurs where the correlation is statistically significant at the 95% confidence level through the Student’s t test. The SST and rainfall data come from ERSST and CHIRPS, respectively.”**

*The order in which things are discussed in the text is wrong. The sequence is 3c, 4, 3b, then 3a.*

**Response: This comment is taken into account. Please see the revised manuscript.**

*Line 290 The statement too strong. Although the anomalies are not significant, the dipole is clearly seen in the correlation patterns.*

**Response: Although a correlation dipole is present, these correlations are weak ( $|r| < 0.2$ ), suggesting a very weak linear relationship between DMI and rainfall over this region. However, Moihamette et al (2024) showed that rainfall over central Africa along the Atlantic coast is significantly influenced by the Atlantic Ocean during IOD episodes, induced by its teleconnection with the Indian Ocean via atmospheric bridges and oceanic pathways. This indicates a weak linear relationship between precipitation in this region and the IOD.**

*Fig. 4 The caption is wrong: b and c are not "as in a" because "a" is precipitation. Also, is DMI the DMI index. The caption implies it is SST averages over the DMI region, but that make no sense. DMI is calculated from two regions which generally have opposite SST anomalies.*

**Response: Thank you for your comment. The title of the figure has been changed. See **Figure 4 caption**.**

**"Fig 4: (a) Indices of standardised rainfall anomalies over 1981-2023, averaged over the red box indicated in Fig. 1. (b) Indices of standardised SST anomalies over 1981-2023, average over the NTA and ATL oceanic regions. (c) As in (b), but for the DMI and ENSO index averaged over the IOD and Niño-3.4 oceanic regions. The SST data come from ERSST."**

*In the discussion of Fig. 6, the Hastenrath papers really need to be included.*

**Response: This comment is taken into account. Please see the revised manuscript in **line 414**.**
